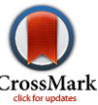

## Correction

# Correction: Learning Gene Networks under SNP Perturbations Using eQTL Datasets

The *PLOS Computational Biology* Staff

## Notice of Republication

This article was republished on March 21, 2014, to correct errors introduced into the equations during typesetting. Please download this article again to view the correct version. The originally published, uncorrected article and the republished, corrected article are provided here for reference.

In the article PDF, in the Materials and Methods section, there were errors in Equations (6), (9) and (10), and in the equations in the text below Equation (6), above Equation (10), and in the paragraph below Equation (10). In all these cases,  $T$  should be superscript for "matrix transpose".

## Supporting Information

**File S1.** Originally published, uncorrected article.  
(PDF)

**File S2.** Republished, corrected article.  
(PDF)

## Reference

1. Zhang L, Kim S (2014) Learning Gene Networks under SNP Perturbations Using eQTL Datasets. *PLoS Comput Biol* 10(2): e1003420. doi:10.1371/journal.pcbi.1003420

---

**Citation:** The *PLOS Computational Biology* Staff (2014) Correction: Learning Gene Networks under SNP Perturbations Using eQTL Datasets. *PLoS Comput Biol* 10(4): e1003608. doi:10.1371/journal.pcbi.1003608

**Published** April 9, 2014

**Copyright:** © 2014 The *PLOS Computational Biology* Staff. This is an open-access article distributed under the terms of the Creative Commons Attribution License, which permits unrestricted use, distribution, and reproduction in any medium, provided the original author and source are credited.
